# Supplementary material for: Study of temporal variability of salivary cortisol and cortisone by LC-MS/MS using a new atmospheric pressure ionization source
Source: PubMed Central journal article supplement (PMC6917784; doi:10.1038/s41598-019-55571-3), 2019-12-17
Supplement: 41598_2019_55571_MOESM1_ESM.pdf [file 41598_2019_55571_MOESM1_ESM.pdf]

# Study of temporal variability of salivary cortisol and cortisone by LC-MS/MS using a new atmospheric pressure ionization source

Jelena Bakusic<sup>1\*</sup>, Siemon De Nys<sup>2</sup>, Matteo Creta<sup>1</sup>, Lode Godderis<sup>1,3</sup>, Radu Corneliu Duca<sup>1,4</sup>

<sup>1</sup> *Environment and Health, Department of Public Health and Primary Care, KU Leuven, Kapucijnenvoer 35, blok d – box 7001, 3000 Leuven, Belgium. [jelena.bakusic@kuleuven.be](mailto:jelena.bakusic@kuleuven.be), [matteo.creta@kuleuven.be](mailto:matteo.creta@kuleuven.be), [lode.godderis@kuleuven.be](mailto:lode.godderis@kuleuven.be), [radu.duca@kuleuven.be](mailto:radu.duca@kuleuven.be)*

<sup>2</sup> *Department of Oral Health Sciences, BIOMAT & University Hospitals Leuven (UZ Leuven), Dentistry, Kapucijnenvoer 7, blok a – box 7001, 3000 Leuven, Belgium. [siemon.denys@kuleuven.be](mailto:siemon.denys@kuleuven.be)*

<sup>3</sup> *IDEWE, External Service for Prevention and Protection at Work, Heverlee, Belgium*

<sup>4</sup> *Unit Environmental Hygiene and Human Biological Monitoring, Department of Health Protection, National Health Laboratory, 1, Rue Louis Rech, L-3555 Dudelange, Luxembourg*

Corresponding authors:

**Jelena Bakusic, MD**

Centre for Environment and Health,  
Department of Public Health and Primary Care,  
KU Leuven (University of Leuven),  
Kapucijnenvoer 35, 3000 Leuven,  
Belgium  
E-mail: [jelena.bakusic@kuleuven.be](mailto:jelena.bakusic@kuleuven.be)

**Radu Corneliu Duca, PhD**

Unit Environmental Hygiene and Human Biological Monitoring  
Department of Health Protection  
National Health Laboratory  
1, Rue Louis Rech,  
L-3555 Dudelange,  
Luxembourg  
E-mail: [radu.duca@Ins.etat.lu](mailto:radu.duca@Ins.etat.lu)

Supplementary information

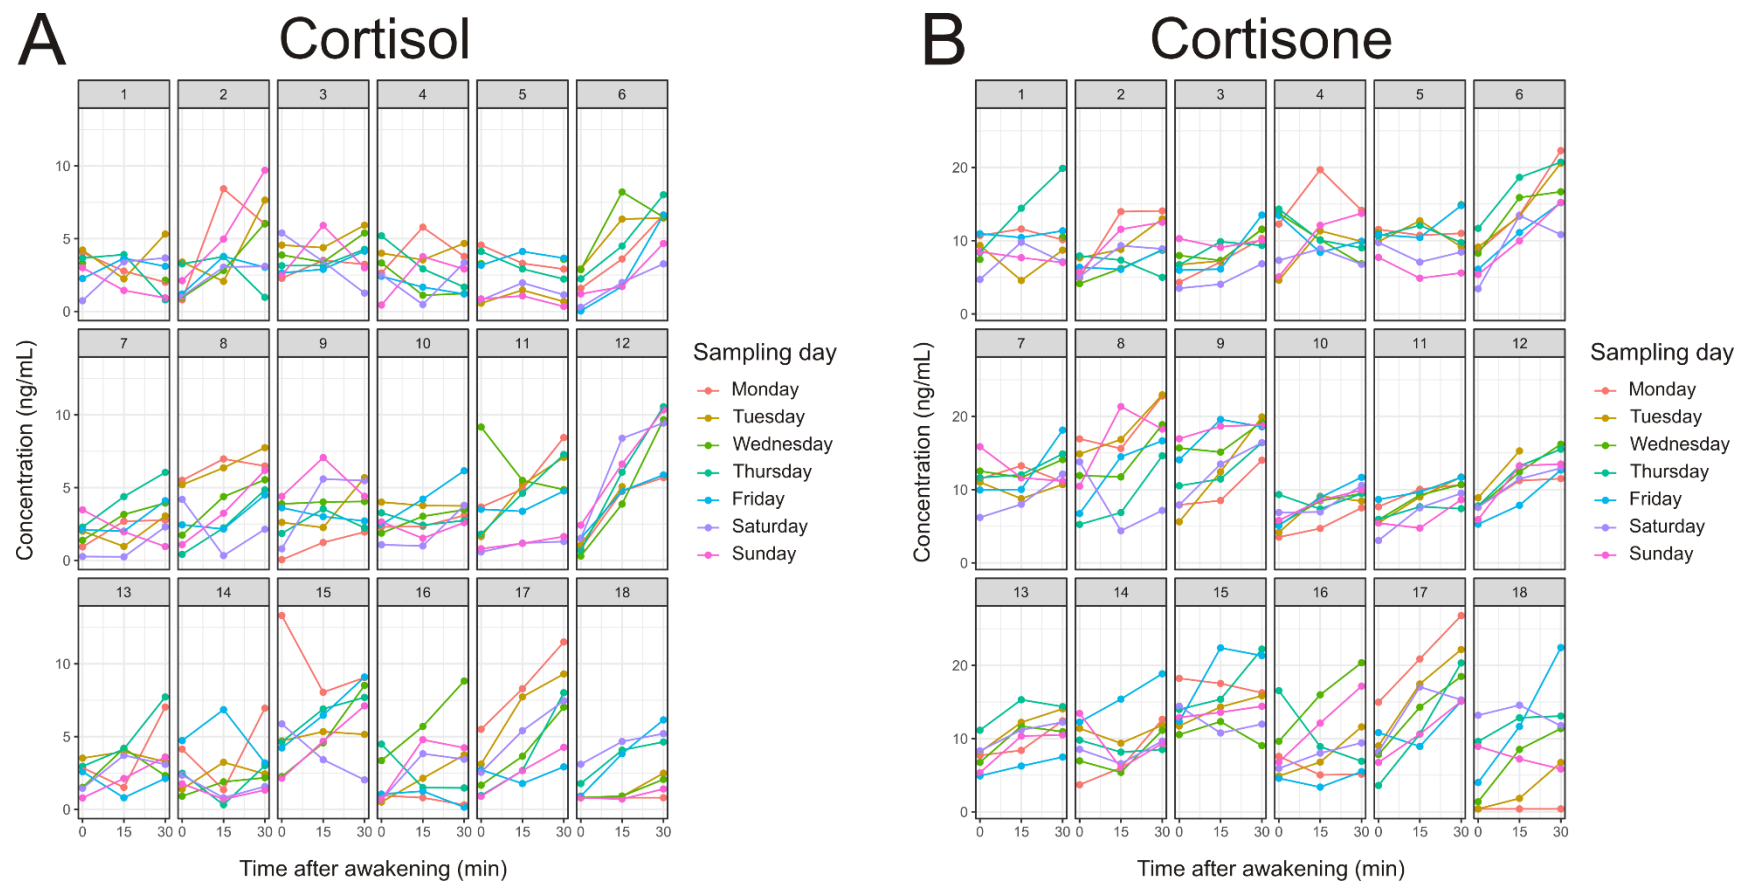

**Supplementary Figure 1.** Overview of cortisol (A) and cortisone (B) concentrations of each participant obtained on each day over one sampling week at 0, 15 and 30 min after awakening
